# Supplementary material
Source: PubMed Central journal article supplement (PMC2848111)

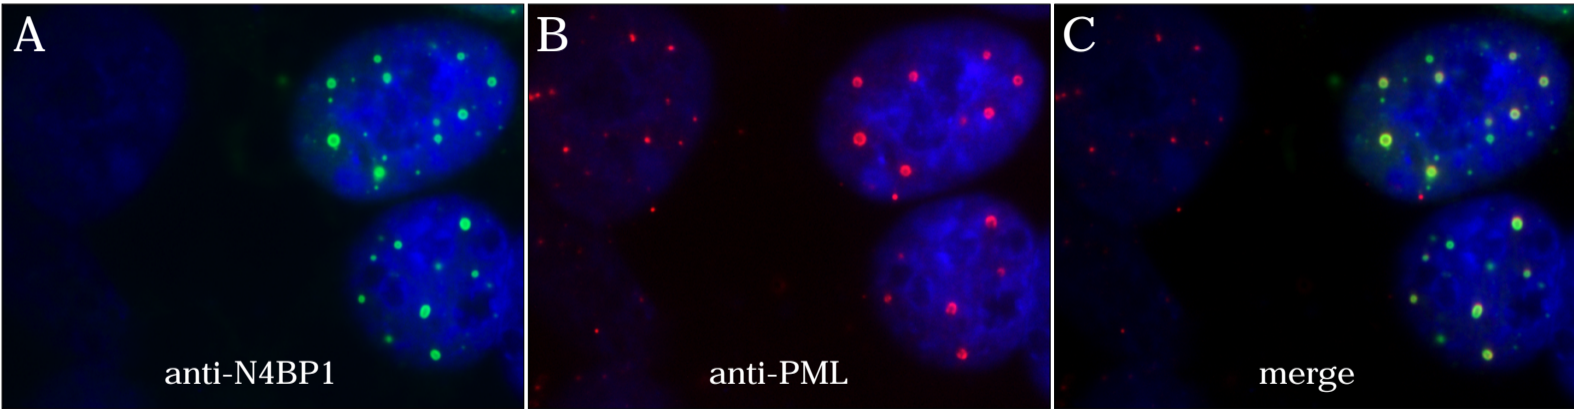

Supplement: jcs.060160_1.pdf [file jcs.060160_1.pdf]

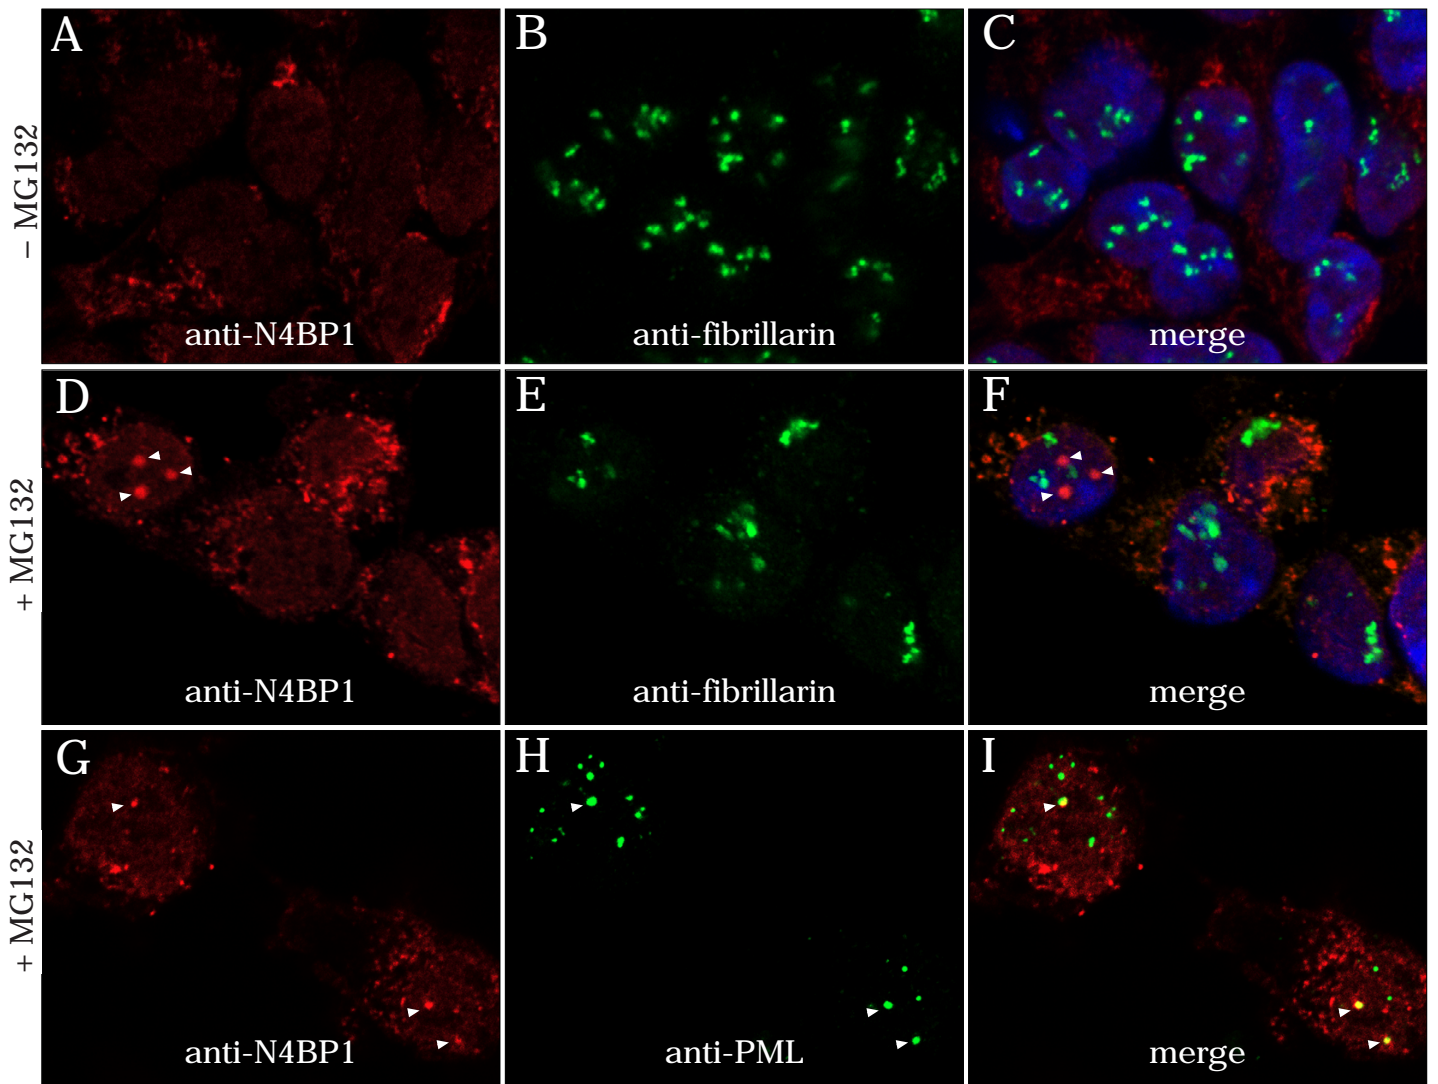

Fig. S2. Endogenous N4BP1 accumulates at PML NBs in MG132 treated HEK293 cells

Supplement: jcs.060160_2.pdf [file jcs.060160_2.pdf]

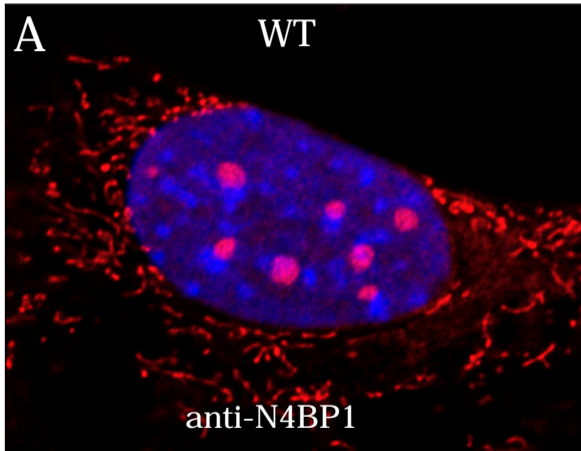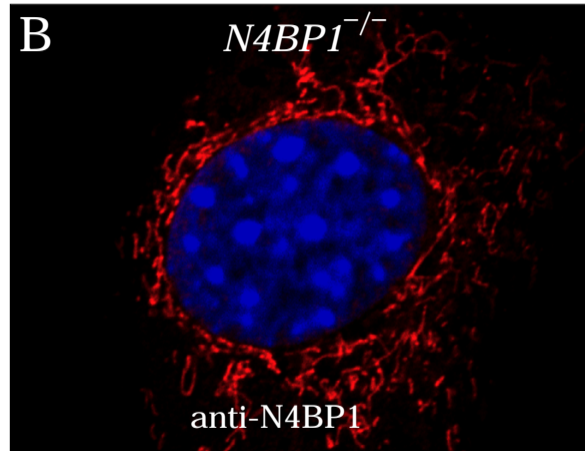

Supplement: jcs.060160_3.pdf [file jcs.060160_3.pdf]
